# Supplementary material for: Extraction of highly degraded DNA from ancient bones, teeth and sediments for high-throughput sequencing
Source: Springer Nature journal article supplement (doi:10.1038/s41596-018-0050-5), 2018-10-15
Supplement: MOESM1 [file 41596_2018_50_MOESM1_ESM.xlsx]

## Sheet: summary
Table S1: Summary of sequencing results.
Sample					DNA extraction and library preparation								Shotgun sequencing
№	Origin	Species	Type	Age	Extraction protocol option	Binding buffer	Lysate used [µl]	Elution volume [µl]	Input library preparation [µl]	№ molecules in library	№ spike-in molecules in library	Conversion rate of oligonucleotide spike-in*	Reference genome	№ sequences generated	Overlap-merged sequences	Overlap-merged sequences ≥35bp	Fraction of sequences ≥35bp	Mapped sequences ≥35bp	Percentage of sequences mapped (≥35bp)	Average length of mapped sequences ≥35bp	Informative sequence content in library	Informative sequence content per µl lysate	5' C to T substitution frequency	3' C to T substitution frequency
S1	Vindija cave	cave bear	bone (postcranial)	~ 47 kya	A: columns	D	1000	100	15	2830000000	616500	1.12295	ursMar0	2603043	2516477	1462199	0.58105	4348	0.297	48.2	2.27846e+08	1.51897e+06	43.5	37.6
S2	Bykovsky peninsula, permafrost	mammoth	bone (tibia)	~ 31 kya			1000	100	15	3533750000	656875	1.19649	loxAfr	2530271	2373134	1913440	0.806292	1169924	61.142	67.6	1.10452e+11	7.36346e+08	19.2	13.2
S3	North Sea	beluga whale	bone (axis)	Holocene			1000	100	15	5771250000	644625	1.17418	turTru1.75	1821518	1720634	1185142	0.688782	109587	9.247	52.3	1.81592e+10	1.21061e+08	34.2	31.8
S4	Gamsulzen cave	cave bear	bone (postcranial)	~ 44 kya			1000	100	15	3941250000	457375	0.833106	ursMar0	1918388	1881843	1211306	0.643681	85314	7.043	56.5	9.90299e+09	6.60199e+07	36.7	27.7
S5	Denisova cave	yak	bone (postcranial)	> 49 kya			1000	100	15	17286250000	544875	0.992486	bosTau6	2380513	2344045	1529598	0.652546	50354	3.292	49.5	1.80996e+10	1.20664e+08	45.2	35.1
S6	Denisova cave	brown bear	tooth	Late Pleistocene			1000	100	15	22887500000	552500	1.00638	ursMar0	2244870	2209515	1676293	0.75867	396036	23.626	55.4	2.23693e+11	1.49128e+09	35.5	25.4
S7	Chagyrskaya cave	-	sediment	45-59 kya			1000	100	15	137125000000	643000	1.17122	turTru1.75	1796845	1758759	1382266	0.785933	19253	1.393	44.8	6.58237e+10	4.38825e+08	34.4	22.1
S8	Denisova cave	-	sediment	Late Pleistocene			1000	100	15	48625000000	518250	0.943989	turTru1.75	2177473	2141280	1577357	0.736642	12937	0.82	43.3	1.25092e+10	8.33944e+07	32.2	21.6
S9	Vindija cave	-	sediment	~ 42 kya			1000	100	15	3583750000	660000	1.20219	turTru1.75	2272413	2225929	1247704	0.560532	713	0.057	44.2	4.97007e+07	331338	7.1	18
S10	Trou Al'Wesse cave	-	sediment	42-49 kya			1000	100	15	4102500000	39350	0.0716758	turTru1.75	1933643	1904382	755385	0.396656	5180	0.686	40.9	4.49496e+08	2.99664e+06	35.3	32.3
S11	Les Cottés cave	-	sediment	41-51 kya			1000	100	15	5132500000	182550	0.332514	turTru1.75	2098099	2048040	961161	0.469308	4185	0.435	40.9	4.18718e+08	2.79145e+06	49.8	40.1
S12	Denisova cave	-	sediment	Middle Pleistocene			1000	100	15	66675000000	508750	0.926685	turTru1.75	2102984	2023337	1648997	0.814989	8993	0.545	44.6	1.27165e+10	8.47765e+07	24.8	15.6
	Extraction negative control						1000	100	15	59500000	406000		hg19	295277	287834	3884	0.0134939	90	2.317	53.4	968436	6456.24	0	0
	Extraction negative control						1000	100	15	66387500	535250		hg19	259734	253107	3390	0.0133935	78	2.301	52.1	1.0387e+06	6924.66	0	0
S1	Vindija cave	cave bear	bone (postcranial)	~ 47 kya	A: columns	G	500	100	15	4535000000	410000	0.746812	ursMar0	2215484	2172438	525281	0.241793	2075	0.395	45.7	1.94108e+08	2.5881e+06	45.4	33.7
S2	Bykovsky peninsula, permafrost	mammoth	bone (tibia)	~ 31 kya			500	100	15	1882000000	207675	0.378279	loxAfr	1882009	1810307	1064788	0.588181	625292	58.725	62.9	3.93307e+10	5.24409e+08	18.6	11
S3	North Sea	beluga whale	bone (axis)	Holocene			500	100	15	7165000000	553875	1.00888	turTru1.75	2516544	2433219	1232589	0.506567	126996	10.303	48.7	1.76088e+10	2.34784e+08	37.1	29.7
S4	Gamsulzen cave	cave bear	bone (postcranial)	~ 44 kya			500	100	15	2687500000	187825	0.342122	ursMar0	1866419	1835238	557484	0.303767	39627	7.108	54.5	3.10976e+09	4.14635e+07	36.1	23.9
S5	Denisova cave	yak	bone (postcranial)	> 49 kya			500	100	15	19782500000	244750	0.445811	bosTau6	2720395	2678080	645030	0.240855	20688	3.207	47.8	7.1911e+09	9.58814e+07	46	31.4
S6	Denisova cave	brown bear	tooth	Late Pleistocene			500	100	15	4388750000	66925	0.121903	ursMar0	2419580	2373704	1046032	0.440675	215171	20.57	56.4	2.20122e+10	2.93496e+08	33.1	18.8
S7	Chagyrskaya cave	-	sediment	45-59 kya			500	100	15	31787500000	110225	0.200774	turTru1.75	1948111	1918566	628206	0.327435	10837	1.725	42.7	7.55057e+09	1.00674e+08	33.5	17.7
S8	Denisova cave	-	sediment	Upper Paleolithic			500	100	15	19572500000	122950	0.223953	turTru1.75	2446915	2411428	760031	0.315179	7621	1.003	41.7	2.542e+09	3.38933e+07	31.5	17.7
S9	Vindija cave	-	sediment	~ 42 kya			500	100	15	3685000000	451875	0.823087	turTru1.75	2099692	2070929	519048	0.250635	396	0.076	41.7	2.8981e+07	386413	8.9	27
S10	Trou Al'Wesse cave	-	sediment	42-49 kya			500	100	15	9363750000	70050	0.127596	turTru1.75	1787850	1761091	221403	0.125719	1561	0.705	41.1	3.36019e+08	4.48025e+06	39.7	31.3
S11	Les Cottés cave	-	sediment	41-51 kya			500	100	15	2165500000	21525	0.0392077	turTru1.75	2096669	2064807	315875	0.15298	1369	0.433	40.4	5.71233e+07	761644	53.3	31.4
S12	Denisova cave	-	sediment	Middle Pleistocene			500	100	15	16890000000	61400	0.11184	turTru1.75	1910078	1859397	728353	0.391715	8149	1.119	41.3	2.976e+09	3.968e+07	26.5	12
	Extraction negative control						500	100	15	65587500	322875		hg19	237255	231422	1604	0.00693106	38	2.369	42.3	444355	5924.73	0	0
	Extraction negative control						500	100	15	55012500	365500		hg19	217217	211775	2707	0.0127824	36	1.33	44	401165	5348.86	0	0
S1	Vindija cave	cave bear	bone (postcranial)	~ 47 kya	B: beads	D	150	30	30	4586875000	690625	1.16364	ursMar0	2715455	2644586	1.25692e+06	0.475281	4444	0.3535	49.5	3.71581e+08	2.47721e+06	44.2	38.05
S2	Bykovsky peninsula, permafrost	mammoth	bone (tibia)	~ 31 kya			150	30	30	6411250000	641750	1.08129	loxAfr4	2.27962e+06	2194326	1.64608e+06	0.750151	980776	59.5895	64.85	1.78879e+11	1.19253e+09	18.5	13.2
S3	North Sea	beluga whale	bone (axis)	Holocene			150	30	30	7616250000	596375	1.00484	turTru1.75	2.10737e+06	2021415	1315132	0.6506	136208	10.355	52.9	2.6041e+10	1.73606e+08	34.6	31.5
S4	Gamsulzen cave	cave bear	bone (postcranial)	~ 44 kya			150	30	30	5873750000	531625	0.968352	ursMar0	1978059	1943090	965292	0.496782	75098	7.7785	54.7	1.21981e+10	8.13206e+07	37.05	28.75
S5	Denisova cave	yak	bone (postcranial)	> 49 kya			150	30	30	29200000000	608125	1.1077	bosTau6	2.34864e+06	2.31795e+06	1010171	0.435804	38254	3.7845	48.6	2.31143e+10	1.54095e+08	45.75	35.7
S6	Denisova cave	brown bear	tooth	Late Pleistocene			150	30	30	27468750000	450625	0.820811	ursMar0	2.17878e+06	2145189	1361806	0.634819	302942	22.244	54.65	2.08725e+11	1.3915e+09	35.75	26.2
S7	Chagyrskaya cave	-	sediment	45-59 kya			150	30	30	151787500000	392500	0.661326	turTru1.75	3.18008e+06	3.12558e+06	1.78e+06	0.569496	31001.5	1.7425	43.35	6.4146e+10	4.2764e+08	33.7	22.05
S8	Denisova cave	-	sediment	Upper Paleolithic			150	30	30	52293750000	421750	0.71061	turTru1.75	2268426	2232055	1240076	0.555576	12889	1.037	42.35	1.25834e+10	8.38893e+07	31.3	21.55
S9	Vindija cave	-	sediment	~ 42 kya			150	30	30	3496875000	584875	0.98546	turTru1.75	2987349	2.93399e+06	1.37273e+06	0.467871	973	0.0705	42.95	4.89182e+07	326121	12.2	9.65
S10	Trou Al'Wesse cave	-	sediment	42-49 kya			150	30	30	8490000000	42737.5	0.0778461	turTru1.75	2.10054e+06	2.06924e+06	568852	0.274909	3983.5	0.7	41	6.60124e+08	4.40083e+06	39.65	31.8
S11	Les Cottés cave	-	sediment	41-51 kya			150	30	30	10140625000	108275	0.197222	turTru1.75	1.84445e+06	1814248	721547	0.397711	3578	0.4955	41	8.06533e+08	5.37689e+06	49.7	45.85
S12	Denisova cave	-	sediment	Middle Pleistocene			150	30	30	93093750000	393500	0.716758	turTru1.75	1775586	1.72423e+06	1149498	0.666671	9485	0.825	42.9	2.13341e+10	1.42227e+08	24.9	15.4
	Extraction negative control						150	30	30	63350000	652875		hg19	271694	261858	5673	0.0216644	77	1.3995	53.6	962326	6415.5	17.2	2.4
	Extraction negative control						150	30	30	57012500	362375		hg19	239712	233836	3431	0.0146727	57	1.6835	51.9	703596	4690.64	0	0
S1	Vindija cave	cave bear	bone (postcranial)	~ 47 kya	B: beads	G	75	30	30	8063750000	618250	1.04169	ursMar0	2465720	2.42727e+06	365267	0.150484	1540	0.422	47.6	2.39729e+08	3.19639e+06	46.8	35.6
S2	Bykovsky peninsula, permafrost	mammoth	bone (tibia)	~ 31 kya			75	30	30	3885625000	439000	0.739674	loxAfr4	2664227	2.60436e+06	1.00448e+06	0.385692	590748	58.8045	58.45	5.03589e+10	6.71452e+08	18.3	11.65
S3	North Sea	beluga whale	bone (axis)	Holocene			75	30	30	8258750000	571375	0.962714	turTru1.75	2232364	2.18114e+06	739050	0.338837	84207.5	11.3965	49.25	1.53429e+10	2.04571e+08	36.7	30.35
S4	Gamsulzen cave	cave bear	bone (postcranial)	~ 44 kya			75	30	30	3646875000	150950	0.274954	ursMar0	1.869e+06	1.83624e+06	317692	0.173012	22958.5	7.225	54.7	2.45043e+09	3.26724e+07	37.35	23.95
S5	Denisova cave	yak	bone (postcranial)	> 49 kya			75	30	30	28531250000	297125	0.541211	bosTau6	2493030	2.45649e+06	393009	0.159988	12760	3.2535	47.55	6.94376e+09	9.25834e+07	47.1	33.45
S6	Denisova cave	brown bear	tooth	Late Pleistocene			75	30	30	5366875000	86600	0.157741	ursMar0	2195260	2.15966e+06	686143	0.317709	139524	20.337	55.35	1.88799e+10	2.51732e+08	32.9	18.85
S7	Chagyrskaya cave	-	sediment	45-59 kya			75	30	30	81300000000	173588	0.292479	turTru1.75	2.55591e+06	2.52433e+06	434142	0.171983	8509	1.963	41.95	1.13542e+10	1.51389e+08	35.55	17.55
S8	Denisova cave	-	sediment	Upper Paleolithic			75	30	30	39762500000	200725	0.338203	turTru1.75	2.82198e+06	2787883	467182	0.167576	5667.5	1.216	40.9	3.26614e+09	4.35486e+07	31.3	19.55
S9	Vindija cave	-	sediment	~ 42 kya			75	30	30	4571250000	509750	0.858882	turTru1.75	2.79141e+06	2.74821e+06	482692	0.175639	405	0.084	41.4	2.74579e+07	366105	9.05	18.7
S10	Trou Al'Wesse cave	-	sediment	42-49 kya			75	30	30	13605000000	86462.5	0.157491	turTru1.75	2423055	2388916	211962	0.0887273	1499.5	0.7065	41.3	3.47722e+08	4.63629e+06	37.1	32.15
S11	Les Cottés cave	-	sediment	41-51 kya			75	30	30	4793750000	45050	0.0820583	turTru1.75	2325877	2.28778e+06	268858	0.117519	1220.5	0.451	40.4	1.01627e+08	1.35502e+06	43.75	28.25
S12	Denisova cave	-	sediment	Middle Pleistocene			75	30	30	41650000000	180450	0.328689	turTru1.75	2.30876e+06	2269343	632882	0.278883	7628.5	1.2065	41.4	5.69739e+09	7.59652e+07	25	12.6
	Extraction negative control						75	30	30	57700000	230000		hg19	255996	245810	3712.5	0.0151032	35	0.9925	46.55	367223	4896.31	16.7	10
	Extraction negative control						75	30	30	60581250	397375		hg19	1.85423e+06	1816626	275751	0.151793	1049	0.844	47.7	1.63482e+06	21797.6	10	5.6
	Library negative control									58500000	632625		hg19	290844	279998	3778	0.013493	20	0.529	55.4	222862		0	0
	Library negative control									62387500	698500		hg19	239556	229383	3042	0.0132617	5	0.164	48.4	63024		0	0
	Library negative control									58637500	507250		hg19	315915	303206	2956	0.00974915	18	0.609	47.8	159700		0	0
	Library negative control									65562500	658000		hg19	384921	368512	3276	0.00888981	19	0.58	46.4	150160		0	0
	Library negative control									63562500	566750		hg19	272716	261283	2233	0.00854629	25	1.12	48.2	280852		0	0
	Library negative control									75362500	741250		hg19	342280	329246	18116	0.0550227	251	1.386	53.6	2.96219e+06		4.3	0
	Library negative control									58912500	519500		hg19	278274	271401	2742	0.0101031	46	1.678	50.9	495690		0	0
	Library negative control									66662500	492000		hg19	339329	331173	4716	0.0142403	41	0.869	44.7	360041		0	0
	Library negative control									67887500	634250		hg19	249038	242018	3178	0.0131313	49	1.542	49.5	661189		0	0
	Library negative control									58637500	470250		hg19	222487	216690	2063	0.00952051	4	0.194	49.2	51867.6		0	0
* To calculate the libray preparation efficiency based on the oligonucleotide spike-in, the № of spike-in molecules in a sample library was compared to the average in the negative control libraries within one set of library preparation.
